# Supplementary material for: New Insulin Glargine 300 Units/mL Versus Glargine 100 Units/mL in People With Type 2 Diabetes Using Basal and Mealtime Insulin: Glucose Control and Hypoglycemia in a 6-Month Randomized Controlled Trial (EDITION 1)
Source: Oxford University Press journal article supplement (doi:10.2337/dc14-0991), 2014-07-31
Supplement: dc140991supplementarydata.pdf [file dc140991supplementarydata.pdf]

SUPPLEMENTARY DATA

**Supplementary Table 1.** Glycemic changes from baseline. Least squares mean reductions from baseline with last observation carried forward

LS=least squares. HbA<sub>1c</sub>=glycated hemoglobin A<sub>1c</sub>. FPG=fasting plasma glucose. SMPG=self-measured plasma glucose.

|                                                              | <b>Gla-300 (n=404)</b>     | <b>Gla-100 (n=400)</b>      |
|--------------------------------------------------------------|----------------------------|-----------------------------|
| <b>HbA<sub>1c</sub></b>                                      |                            |                             |
| Baseline, mean (SD) (%)<br>(mmol/mol)                        | 8.14 (0.78)<br>65.5 (8.5)  | 8.14 (0.76)<br>65.5 (8.3)   |
| Last visit, mean (SD) (%)<br>(mmol/mol)                      | 7.25 (0.85)<br>55.7 (9.3)  | 7.28 (0.92)<br>56.1 (10.1)  |
| Mean change (SD) (%)<br>(mmol/mol)                           | -0.88 (0.81)<br>-9.6 (8.9) | -0.86 (0.92)<br>-9.4 (10.1) |
| LS mean change (SE) (%)<br>(mmol/mol)                        | -0.83 (0.06)<br>-9.1 (0.7) | -0.83 (0.06)<br>-9.1 (0.7)  |
| <b>Participants attaining HbA<sub>1c</sub> targets (%)</b>   |                            |                             |
| <7.0% (53 mmol/mol)                                          | 39.6                       | 40.9                        |
| ≤6.5% (48 mmol/mol)                                          | 21.0                       | 21.6                        |
| <b>FPG, mean (mmol/L)</b>                                    |                            |                             |
| Baseline (SD)                                                | 8.72 (2.83)                | 8.90 (2.94)                 |
| Last visit (SD)                                              | 7.24 (2.57)                | 7.21 (2.40)                 |
| Mean change (SD)                                             | -1.48 (3.11)               | -1.69 (3.21)                |
| LS mean change                                               | -1.29 (0.19)               | -1.38 (0.19)                |
| <b>Participants attaining FPG targets (%)</b>                |                            |                             |
| ≤6.7 mmol/L                                                  | 46.3                       | 44.9                        |
| ≤5.6 mmol/L                                                  | 26.5                       | 23.2                        |
| <b>SMPG profiles</b>                                         |                            |                             |
| All 8 measurements, mean (mmol/L)                            |                            |                             |
| Baseline (SD)                                                | 9.28 (2.04)                | 9.45 (2.24)                 |
| Last visit (SD)                                              | 8.14 (2.05)                | 8.13 (1.98)                 |
| Mean change (SD)                                             | -1.14 (2.23)               | -1.32 (2.48)                |
| LS mean change (SE)                                          | -0.987 (0.16)              | -1.073 (0.16)               |
| Pre-breakfast, mean (mmol/L)                                 |                            |                             |
| Baseline (SD)                                                | 8.47 (2.06)                | 8.58 (2.10)                 |
| Last visit (SD)                                              | 7.05 (1.90)                | 6.69 (1.64)                 |
| Mean change (SD)                                             | -1.42 (2.11)               | -1.89 (2.17)                |
| 03:00 h, mean (mmol/L)                                       |                            |                             |
| Baseline (SD)                                                | 8.44 (3.34)                | 8.62 (3.26)                 |
| Last visit (SD)                                              | 7.57 (2.99)                | 7.46 (2.91)                 |
| Mean change (SD)                                             | -0.87 (3.91)               | -1.17 (3.8)                 |
| LS mean change (SE)                                          | -0.98 (0.25)               | -1.16 (0.25)                |
| <b>Pre-injection, mean (mmol/L)</b>                          |                            |                             |
| Baseline (SD)                                                | 10.31 (2.58)               | 10.44 (2.65)                |
| Last visit (SD)                                              | 9.10 (2.42)                | 9.27 (2.44)                 |
| Change (SD)                                                  | -1.21 (2.83)               | -1.17 (2.69)                |
| LS mean change (SE)                                          | -0.90 (0.18)               | -0.84 (0.18)                |
| <b>Pre-injection, variability (coefficient of variation)</b> |                            |                             |
| Baseline (SD)                                                | 25.55 (12.41)              | 24.97 (11.82)               |
| Last visit (SD)                                              | 22.21 (11.75)              | 21.60 (11.52)               |
| Mean change (SD)                                             | -3.33 (14.56)              | -3.37 (14.57)               |
| LS mean change (SE)                                          | -1.10 (1.22)               | -1.08 (1.22)                |

SUPPLEMENTARY DATA

**Supplementary Table 2.** Incidence of hypoglycemic events (% of participants affected) for Gla-300 versus Gla-100 during 6 months of treatment, by intervals of time of day.

|                                                                         | Hypoglycemia at any time of day or night (24 h) |            | Nocturnal hypoglycemia (00:00–05:59) |            | Daytime hypoglycemia (06:00–23:59) |            |
|-------------------------------------------------------------------------|-------------------------------------------------|------------|--------------------------------------|------------|------------------------------------|------------|
|                                                                         | <i>No. participants (%)</i>                     |            | <i>No. participants (%)</i>          |            | <i>No. participants (%)</i>        |            |
|                                                                         | Gla-300                                         | Gla-100    | Gla-300                              | Gla-100    | Gla-300                            | Gla-100    |
|                                                                         | (n=404)                                         | (n=402)    | (n=404)                              | (n=402)    | (n=404)                            | (n=402)    |
| <b>Any hypoglycemia</b>                                                 |                                                 |            |                                      |            |                                    |            |
| Baseline to month 6                                                     | 337 (83.4)                                      | 356 (88.6) | 183 (45.3)                           | 240 (59.7) | 328 (81.2)                         | 345 (85.8) |
| Baseline to week 8                                                      | 266 (65.8)                                      | 311 (77.4) | 109 (27.0)                           | 150 (37.3) | 261 (64.6)                         | 301 (74.9) |
| Week 9 to month 6                                                       | 306 (75.7)                                      | 312 (77.6) | 151 (37.4)                           | 187 (46.5) | 293 (72.5)                         | 293 (72.9) |
| <b>Documented symptomatic hypoglycemia <math>\leq 3.9</math> mmol/L</b> |                                                 |            |                                      |            |                                    |            |
| Baseline to month 6                                                     | 283 (70.0)                                      | 313 (77.9) | 145 (35.9)                           | 194 (48.3) | 265 (65.6)                         | 293 (72.9) |
| Baseline to week 8                                                      | 200 (49.5)                                      | 248 (61.7) | 79 (19.6)                            | 105 (26.1) | 186 (46.0)                         | 226 (56.2) |
| Week 9 to month 6                                                       | 249 (61.6)                                      | 252 (62.7) | 115 (28.5)                           | 149 (37.1) | 229 (56.7)                         | 229 (57.0) |
| <b>Documented symptomatic hypoglycemia <math>\leq 3.0</math> mmol/L</b> |                                                 |            |                                      |            |                                    |            |
| Baseline to month 6                                                     | 151 (37.4)                                      | 167 (41.5) | 49 (12.1)                            | 68 (16.9)  | 131 (32.4)                         | 141 (35.1) |
| Baseline to week 8                                                      | 87 (21.5)                                       | 101 (25.1) | 27 (6.7)                             | 30 (7.5)   | 72 (17.8)                          | 85 (21.1)  |
| Week 9 to month 6                                                       | 119 (29.5)                                      | 114 (28.4) | 36 (8.9)                             | 46 (11.4)  | 103 (25.5)                         | 96 (23.9)  |
| <b>Asymptomatic hypoglycemia <math>\leq 3.9</math> mmol/L</b>           |                                                 |            |                                      |            |                                    |            |
| Baseline to month 6                                                     | 255 (63.1)                                      | 274 (68.2) | 84 (20.8)                            | 102 (25.4) | 245 (60.6)                         | 263 (65.4) |
| Baseline to week 8                                                      | 180 (44.6)                                      | 206 (51.2) | 39 (9.7)                             | 55 (13.7)  | 174 (43.1)                         | 197 (49.0) |
| Week 9 to month 6                                                       | 209 (51.7)                                      | 216 (53.7) | 62 (15.3)                            | 68 (16.9)  | 198 (49.0)                         | 202 (50.2) |
| <b>Severe hypoglycemia</b>                                              |                                                 |            |                                      |            |                                    |            |
| Baseline to month 6                                                     | 20 (5.0)                                        | 23 (5.7)   | 8 (2.0)                              | 10 (2.5)   | 17 (4.2)                           | 16 (4.0)   |
| Baseline to week 8                                                      | 6 (1.5)                                         | 11 (2.7)   | 3 (0.7)                              | 3 (0.7)    | 5 (1.2)                            | 8 (2.0)    |
| Week 9 to month 6                                                       | 18 (4.5)                                        | 14 (3.5)   | 5 (1.2)                              | 7 (1.7)    | 16 (4.0)                           | 10 (2.5)   |
| <b>Confirmed (<math>\leq 3.9</math> mmol/L) or severe hypoglycemia</b>  |                                                 |            |                                      |            |                                    |            |
| Baseline to month 6                                                     | 331 (81.9)                                      | 353 (87.8) | 180 (44.6)                           | 231 (57.5) | 321 (79.5)                         | 339 (84.3) |
| Baseline to week 8                                                      | 260 (64.4)                                      | 302 (75.1) | 106 (26.2)                           | 134 (33.3) | 255 (63.1)                         | 288 (71.6) |
| Week 9 to month 6                                                       | 302 (74.8)                                      | 312 (77.6) | 146 (36.1)                           | 184 (45.8) | 288 (71.3)                         | 290 (72.1) |
| <b>Confirmed (<math>\leq 3.0</math> mmol/L) or severe hypoglycemia</b>  |                                                 |            |                                      |            |                                    |            |
| Baseline to month 6                                                     | 181 (44.8)                                      | 201 (50.0) | 63 (15.6)                            | 82 (20.4)  | 164 (40.6)                         | 171 (42.5) |
| Baseline to week 8                                                      | 111 (27.5)                                      | 121 (30.1) | 34 (8.4)                             | 39 (9.7)   | 97 (24.0)                          | 101 (25.1) |
| Week 9 to month 6                                                       | 150 (37.1)                                      | 147 (36.6) | 44 (10.9)                            | 53 (13.2)  | 136 (33.7)                         | 127 (31.6) |

SUPPLEMENTARY DATA

**Supplementary Table 3.** Hypoglycemic events and event-rates (per participant-year of exposure) for Gla-300 versus Gla-100 during 6 months of treatment, by intervals of time of day.

|                                                                         | <b>Hypoglycemia at any time of day or night (24 h)</b> |                | <b>Nocturnal hypoglycemia (00:00–05:59)</b> |                | <b>Daytime hypoglycemia (06:00–23:59)</b>   |                 |
|-------------------------------------------------------------------------|--------------------------------------------------------|----------------|---------------------------------------------|----------------|---------------------------------------------|-----------------|
|                                                                         | <i>Events (Events per participant-year)</i>            |                | <i>Events (Events per participant-year)</i> |                | <i>Events (Events per participant-year)</i> |                 |
|                                                                         | <b>Gla-300</b>                                         | <b>Gla-100</b> | <b>Gla-300</b>                              | <b>Gla-100</b> | <b>Gla-300</b>                              | <b>Gla-100</b>  |
|                                                                         | <b>(n=404)</b>                                         | <b>(n=402)</b> | <b>(n=404)</b>                              | <b>(n=402)</b> | <b>(n=404)</b>                              | <b>(n=402)</b>  |
| <b>Any hypoglycemia</b>                                                 |                                                        |                |                                             |                |                                             |                 |
| Baseline to month 6                                                     | 5138<br>(26.37)                                        | 5430 (28.08)   | 646 (3.32)                                  | 883 (4.57)     | 4491<br>(23.05)                             | 4545<br>(23.50) |
| Baseline to week 8                                                      | 1822<br>(29.13)                                        | 2070 (33.40)   | 229 (3.66)                                  | 324 (5.23)     | 1593<br>(25.47)                             | 1744<br>(28.14) |
| Week 9 to month 6                                                       | 3316<br>(25.06)                                        | 3360 (25.56)   | 417 (3.15)                                  | 559 (4.25)     | 2898<br>(21.90)                             | 2801<br>(21.31) |
| <b>Documented symptomatic hypoglycemia <math>\leq 3.9</math> mmol/L</b> |                                                        |                |                                             |                |                                             |                 |
| Baseline to month 6                                                     | 2626<br>(13.48)                                        | 2855 (14.76)   | 375 (1.92)                                  | 623 (3.22)     | 2251<br>(11.55)                             | 2232<br>(11.54) |
| Baseline to week 8                                                      | 925<br>(14.79)                                         | 1071 (17.28)   | 138 (2.21)                                  | 203 (3.28)     | 787<br>(12.58)                              | 868<br>(14.01)  |
| Week 9 to month 6                                                       | 1701<br>(12.86)                                        | 1784 (13.57)   | 237 (1.79)                                  | 420 (3.20)     | 1464<br>(11.06)                             | 1364<br>(10.38) |
| <b>Documented symptomatic hypoglycemia <math>\leq 3.0</math> mmol/L</b> |                                                        |                |                                             |                |                                             |                 |
| Baseline to month 6                                                     | 474 (2.43)                                             | 512 (2.65)     | 89 (0.46)                                   | 124 (0.64)     | 385 (1.98)                                  | 388 (2.01)      |
| Baseline to week 8                                                      | 175 (2.80)                                             | 186 (3.00)     | 34 (0.54)                                   | 41 (0.66)      | 141 (2.25)                                  | 145 (2.34)      |
| Week 9 to month 6                                                       | 299 (2.26)                                             | 326 (2.48)     | 55 (0.42)                                   | 83 (0.63)      | 244 (1.84)                                  | 243 (1.85)      |
| <b>Asymptomatic hypoglycemia <math>\leq 3.9</math> mmol/L</b>           |                                                        |                |                                             |                |                                             |                 |
| Baseline to month 6                                                     | 2220<br>(11.39)                                        | 2173 (11.24)   | 215 (1.10)                                  | 171 (0.88)     | 2005<br>(10.29)                             | 2001<br>(10.35) |
| Baseline to week 8                                                      | 785<br>(12.55)                                         | 805 (12.99)    | 71 (1.14)                                   | 73 (1.18)      | 714<br>(11.42)                              | 731<br>(11.80)  |
| Week 9 to month 6                                                       | 1435<br>(10.84)                                        | 1368 (10.41)   | 144 (1.09)                                  | 98 (0.75)      | 1291<br>(9.76)                              | 1270<br>(9.66)  |
| <b>Severe hypoglycemia</b>                                              |                                                        |                |                                             |                |                                             |                 |
| Baseline to month 6                                                     | 53 (0.27)                                              | 47 (0.24)      | 12 (0.06)                                   | 15 (0.08)      | 41 (0.21)                                   | 32 (0.17)       |
| Baseline to week 8                                                      | 11 (0.18)                                              | 15 (0.24)      | 6 (0.10)                                    | 4 (0.06)       | 5 (0.08)                                    | 11 (0.18)       |
| Week 9 to month 6                                                       | 42 (0.32)                                              | 32 (0.24)      | 6 (0.05)                                    | 11 (0.08)      | 36 (0.27)                                   | 21 (0.16)       |
| <b>Confirmed (<math>\leq 3.9</math> mmol/L) or severe hypoglycemia</b>  |                                                        |                |                                             |                |                                             |                 |
| Baseline to month 6                                                     | 4966<br>(25.48)                                        | 5176 (26.76)   | 610 (3.13)                                  | 813 (4.20)     | 4356<br>(22.35)                             | 4362<br>(22.55) |
| Baseline to week 8                                                      | 1743<br>(27.87)                                        | 1934 (31.21)   | 217 (3.47)                                  | 281 (4.53)     | 1526<br>(24.40)                             | 1652<br>(26.66) |
| Week 9 to month 6                                                       | 3223<br>(24.36)                                        | 3242 (24.67)   | 393 (2.97)                                  | 532 (4.05)     | 2830<br>(21.39)                             | 2710<br>(20.62) |
| <b>Confirmed (<math>\leq 3.0</math> mmol/L) or severe hypoglycemia</b>  |                                                        |                |                                             |                |                                             |                 |

SUPPLEMENTARY DATA

|                     |            |            |            |            |            |            |
|---------------------|------------|------------|------------|------------|------------|------------|
| Baseline to month 6 | 737 (3.78) | 698 (3.61) | 122 (0.63) | 156 (0.81) | 615 (3.16) | 542 (2.80) |
| Baseline to week 8  | 265 (4.24) | 266 (4.29) | 51 (0.82)  | 55 (0.89)  | 214 (3.42) | 211 (3.40) |
| Week 9 to month 6   | 472 (3.57) | 432 (3.29) | 71 (0.54)  | 101 (0.77) | 401 (3.03) | 331 (2.52) |

**Supplementary Table 4.** Assessment of treatment satisfaction using the Diabetes Treatment Satisfaction Questionnaire (DTSQ)

LS=least squares.

| Mean (SD)*                                          | Gla-300 (n=404)             |            |                      | Gla-100 (n=402)             |            |                      |
|-----------------------------------------------------|-----------------------------|------------|----------------------|-----------------------------|------------|----------------------|
|                                                     | Baseline                    | Month 6    | Change from baseline | Baseline                    | Month 6    | Change from baseline |
| Current treatment                                   | 5.1 (1.3)                   | 5.6 (0.7)  | 0.45 (1.2)           | 5.5 (1.1)                   | 5.6 (0.6)  | 0.43 (1.1)           |
| Convenience                                         | 4.8 (1.3)                   | 5.3 (1.1)  | 0.47 (1.3)           | 4.9 (1.2)                   | 5.3 (1.0)  | 0.44 (1.3)           |
| Flexibility                                         | 4.8 (1.3)                   | 5.2 (1.2)  | 0.46 (1.4)           | 4.8 (1.3)                   | 5.2 (1.1)  | 0.42 (1.4)           |
| Understanding                                       | 4.8 (1.2)                   | 5.3 (0.9)  | 0.48 (1.2)           | 4.9 (1.2)                   | 5.2 (0.8)  | 0.33 (1.1)           |
| Recommend                                           | 5.2 (1.2)                   | 5.6 (0.9)  | 0.43 (1.3)           | 5.2 (1.2)                   | 5.6 (0.8)  | 0.35 (1.3)           |
| Continue                                            | 5.1 (1.2)                   | 5.6 (0.9)  | 0.46 (1.3)           | 5.2 (1.2)                   | 5.6 (0.7)  | 0.43 (1.3)           |
| Total Score                                         | 29.7 (5.9)                  | 32.5 (4.4) | 2.85 (5.6)           | 30.2 (5.7)                  | 32.6 (3.8) | 2.48 (5.5)           |
| LS Mean change in total score (Baseline to Month 6) | 2.32<br>95% CI 1.72 to 2.93 |            |                      | 2.24<br>95% CI 1.63 to 2.85 |            |                      |

\*Maximum score in each category is 6.

SUPPLEMENTARY DATA

**Supplementary Table 5.** Treatment-emergent serious adverse events.

|                                                                            | <b>Gla-300 (n=404)</b> | <b>Gla-100 (n=402)</b> |
|----------------------------------------------------------------------------|------------------------|------------------------|
| Any class                                                                  | 26 (6.4)               | 21 (5.2)               |
| Infections and infestations                                                | 7 (1.7)                | 5 (1.2)                |
| Cellulitis                                                                 | 0                      | 1 (0.2%)               |
| Erysipelas                                                                 | 1 (0.2)                | 0                      |
| Diverticulitis                                                             | 0                      | 1 (0.2)                |
| Osteomyelitis                                                              | 2 (0.5)                | 1 (0.2)                |
| Endocarditis                                                               | 1 (0.2)                | 0                      |
| Groin abscess                                                              | 1 (0.2)                | 0                      |
| Bronchitis                                                                 | 1 (0.2)                | 0                      |
| Bronchopneumonia                                                           | 1 (0.2)                | 0                      |
| Pneumonia                                                                  | 0                      | 2 (0.5)                |
| Sepsis                                                                     | 1 (0.2)                | 1 (0.2)                |
| Septic embolus                                                             | 1 (0.2)                | 0                      |
| Pyelonephritis acute                                                       | 0                      | 1 (0.2)                |
| Neoplasms (benign, malignant, and unspecified, including cysts and polyps) | 3 (0.7)                | 1 (0.2)                |
| Breast cancer                                                              | 1 (0.2)                | 0                      |
| Chronic myeloid leukemia                                                   | 0                      | 1 (0.2)                |
| Prostate cancer                                                            | 1 (0.2)                | 0                      |
| Metastatic bronchial carcinoma                                             | 1 (0.2)                | 0                      |
| Metabolism and nutrition disorders                                         | 1 (0.2)                | 3 (0.7)                |
| Hyperkalemia                                                               | 0                      | 1 (0.2)                |
| Diabetes mellitus inadequate control                                       | 0                      | 1 (0.2)                |
| Hypoglycemia                                                               | 1 (0.2)                | 1 (0.2)                |
| Psychiatric disorders                                                      | 0                      | 1 (0.2)                |
| Depression                                                                 | 0                      | 1 (0.2)                |
| Nervous system disorders                                                   | 3 (0.7)                | 2 (0.5)                |
| Transient ischemic attack                                                  | 1 (0.2)                | 0                      |
| Hypoglycemic unconsciousness                                               | 2 (0.5)                | 0                      |
| Syncope                                                                    | 0                      | 1 (0.2)                |
| Guillain-Barré syndrome                                                    | 0                      | 1 (0.2)                |
| Cardiac disorders                                                          | 6 (1.5)                | 7 (1.7)                |
| Bundle branch block left                                                   | 0                      | 1 (0.2)                |
| Atrial fibrillation                                                        | 1 (0.2)                | 1 (0.2)                |
| Ventricular tachycardia                                                    | 1 (0.2)                | 0                      |
| Aortic valve stenosis                                                      | 0                      | 1 (0.2)                |
| Coronary artery disease                                                    | 2 (0.5)                | 1 (0.2)                |
| Acute coronary syndrome                                                    | 1 (0.2)                | 0                      |
| Angina pectoris                                                            | 0                      | 1 (0.2)                |
| Myocardial ischemia                                                        | 1 (0.2)                | 1 (0.2)                |
| Cardiac failure                                                            | 0                      | 1 (0.2)                |
| Cardiac chronic failure                                                    | 0                      | 1 (0.2)                |

## SUPPLEMENTARY DATA

|                                                      |         |         |
|------------------------------------------------------|---------|---------|
| Vascular disorders                                   | 0       | 1 (0.2) |
| Aortic stenosis                                      | 0       | 1 (0.2) |
| Respiratory, thoracic and mediastinal disorders      | 1 (0.2) | 0       |
| Dyspnea exertional                                   | 1 (0.2) | 0       |
| Gastrointestinal disorders                           | 1 (0.2) | 0       |
| Ileus                                                | 1 (0.2) | 0       |
| Hepatobiliary disorders                              | 0       | 1 (0.2) |
| Cholelithiasis                                       | 0       | 1 (0.2) |
| Skin and subcutaneous tissue disorders               | 1 (0.2) | 0       |
| Diabetic foot                                        | 1 (0.2) | 0       |
| Musculoskeletal and connective tissue disorders      | 2 (0.5) | 2 (0.5) |
| Osteoarthritis                                       | 1 (0.2) | 0       |
| Spondylitis                                          | 0       | 1 (0.2) |
| Rhabdomyolysis                                       | 1 (0.2) | 0       |
| Musculoskeletal chest pain                           | 0       | 1 (0.2) |
| Renal and urinary disorders                          | 2 (0.5) | 3 (0.7) |
| Urinary bladder polyp                                | 1 (0.2) | 0       |
| Diabetic nephropathy                                 | 0       | 1 (0.2) |
| Renal failure acute                                  | 1 (0.2) | 0       |
| Renal failure chronic                                | 0       | 2 (0.5) |
| Nephrolithiasis                                      | 0       | 1 (0.2) |
| Reproductive system and breast disorders             | 1 (0.2) | 0       |
| Metrorrhagia                                         | 1 (0.2) | 0       |
| General disorders and administration site conditions | 1 (0.2) | 1 (0.2) |
| Non-cardiac chest pain                               | 1 (0.2) | 1 (0.2) |
| Injury, poisoning and procedural complications       | 2 (0.5) | 4 (1.0) |
| Meniscus lesion                                      | 1 (0.2) | 0       |
| Toxicity to various agents                           | 0       | 1 (0.2) |
| Subdural hematoma                                    | 0       | 1 (0.2) |
| Fall                                                 | 1 (0.2) | 1 (0.2) |
| Head injury                                          | 0       | 1 (0.2) |
| Airway complication of anesthesia                    | 0       | 1 (0.2) |

SUPPLEMENTARY DATA

**Supplementary Figure 1.** Participant flow diagram.  
HbA<sub>1c</sub>=glycated hemoglobin A<sub>1c</sub>. mITT=modified intention to treat.

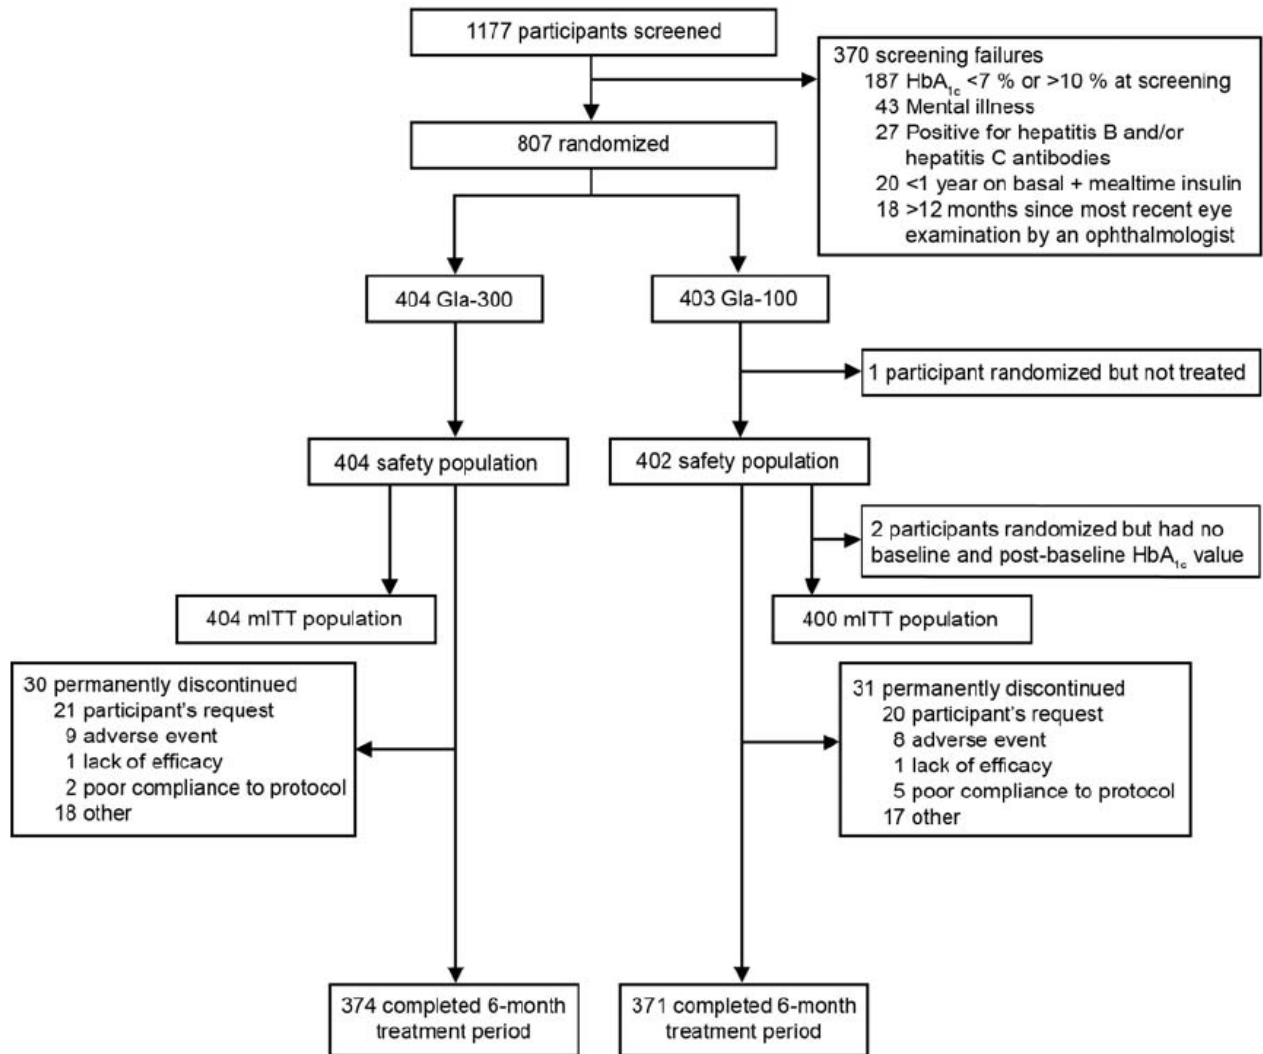

SUPPLEMENTARY DATA

**Supplementary Figure 2.** Eight-point SMPG profile at baseline and at the end of treatment in the modified intent-to-treat population.

LOCF=last observation carried forward. SMPG=self-measured plasma glucose.

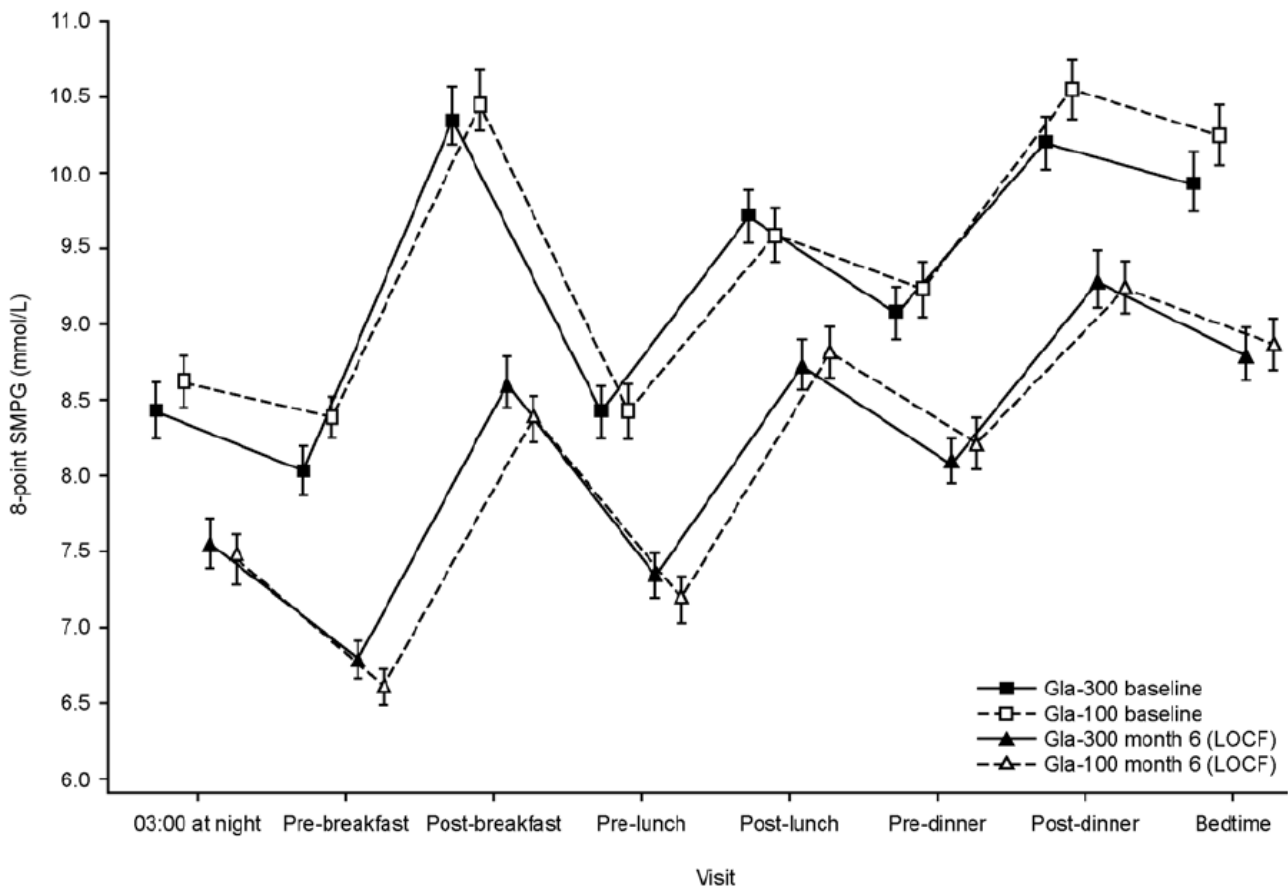



## SUPPLEMENTARY DATA

### List of investigators

**Canada:** Ronnie Aronson; Gordon Bailey; Jean-Louis Chiasson; Ripple Dhillon; Richard Dumas; Ronald Goldenberg; Irving Gottesman; Irene Hramiak; Michael Jones; Lawrence Leiter; Zubin Punthakee; Remi Rabasa Lhoret; Nouhad Saliba; Zeina Yared; Daniel Shu; Linda Sinnaeve; Gene Vitug; Sean Wharton; Vincent Woo; Stuart Ross; Douglas Morrison; Joseph Berlingieri; Francois Dube

**Czech Republic:** Michal Brada; Libor Okenka; Alena Smahelova; Tomas Edelsberger; Renata Vetesnikova; Lea Raclavska; Vlasta Kutejova; Martin Haluzik; Jitka Hasalova Zapletalova; Anna Rancova

**Estonia:** Anu Ambos; Liina Viitas; Tiina Jurgenson; Verner Fogel; Toomas Podar; Arved Kristjan

**Finland:** Timo Valle; Jorma Strand; Sakari Nieminen; Leo Niskanen

**France:** Nathalie Jeandidier; Didier Gouet

**Germany:** Tasso Bieler; Hans-Joachim Herrmann

**Hungary:** Tamás Oroszlan; Albert Szocs; Gábor Holzinger; Éva Péterfai; Gizella Petró; Marietta Baranyai; Zsolt Gaal; Eleonora Harcsa; Piroska Kis-Gombos; Gabor Nyirati; Zsolt Plés; Ferenc Poór; Anikó Somogyi; Janos Bardos; Adam Tabak; Gyula Tamas; Ildikó Sasvári; Laszlo Schandl; Mihály Dudás

**Latvia:** Ilze Konrade; Valdis Pirags; Renate Helda; Indra Stelmane; Dace Teterovska; Anita Eglite

**Mexico:** Leobardo Sauque-Reyna; Jose Gonzalez-Gonzalez; Marco Morales-De Teresa; Silvia Jimenez-Ramos; Jesus Lujan-Reyes

**Netherlands:** Joop Van Den Bergh; Aloysius Lieveuse; Adriaan Kooy; Godefridus Storms; Klaas Hoogenberg; Loek De Heide; Peter De Vries

**Romania:** Noemi Pletea; Anca Cerghizan; Adriana Onaca; Ella Pintilei; Cornelia Zetu; Dan Cheta; Mircea Munteanu; Michaela Diaconu Sotropa; Carmen Crisan

**South Africa:** Suzanne Blignaut; Francois Bonnici; Larry Distiller; Graham Ellis; Johanna Kok; Hemant Makan; Helena Oosthuizen

**United States:** Julio Rosenstock; Mark Christiansen; Richard Guthrie; Raymond Fink; Robert Henry; Kishor Joshi; Ronald Hsieh; Wasim Deeb; Robert Burr; Joseph F Kasper; David Sutton; Jose Mandry; Jean-Louis Selam; James Thrasher; Christine Lai; Rajeev Jain; Frank Mikell; Hiralal Maheshwari; Thomas Blevins; Lisa Cohen; David M Johnson; Helena Rodbard; James Larocque; Vanita Aroda; Michael Reeves; Charles Lovell; Raymond De La Rosa; Michael Rothberg; Brian Webster; Priscilla Hollander; John Palmer; Loray Blair-Britt; Sam Lerman; Carl Vance; Jose De Souza; Ola Odugbesan; Paul Rosenblit; Samer Nakhle; George Dailey; Jack Wahlen; Richard Bernstein; Peter Meyers; Opada Alzohaili; Michael Lillestol; Joseph Gonzalez-Campoy; Ernie Riffer; Thomas Bauch; Paul Evans; Gregory Hughes; Peter Winkle; Ronald Stegemoller; Ronald Mayfield; Paul Moore; Alan

## SUPPLEMENTARY DATA

Hoffman; Edward Kerwin; Bethany Klopfenstein; Richard Bergenstal; Glenn Matfin; Scott Segel; Thomas O'Connor; David Allen; David Podlecki; Jonathan Condit; Thomas Moretto; Elise Kwon; Jill Beavins; Brian Riveland; Ahmed Arif; Jerome Daniel; Samir Arora; Aaron Vinik; Kari Uusinarkaus; Anuj Bhargava; Stanley Stringam; Nizar Daboul; Robert Strzinec; Connie Hsu; Daniel Weiss; Paul Martin; Timothy Boehm; Michael Valitutto; Jane Bridges; Kerem Ozer; David Kayne; John Earl; Sanford Plevin; Henry Simon

**Protocol summary: 6-month, multicenter, randomized, open-label, parallel-group study comparing the efficacy and safety of a new formulation of insulin glargine and Lantus® both plus mealtime insulin in people with type 2 diabetes mellitus with a 6-month safety extension period (EDITION 1; NCT01499082)**

**Principal investigator:** Dr Matthew Riddle

Oregon Health and Science University L-345, 3181 SW Sam Jackson Park Road, Portland, OR 97239–3098, USA

[riddlem@ohsu.edu](mailto:riddlem@ohsu.edu), Tel: +1-503-494-8488

### **Study centers**

Canada (2 centers), Czech Republic (10 centers), Estonia (6 centers), Finland (3 centers), France (2 centers), Germany (3 centers), Hungary (17 centers), Latvia (6 centers), Mexico (5 centers), The Netherlands (8 centers), Romania (9 centers), South Africa (7 centers), USA (95 centers).

### **Background**

Long-acting basal insulin analogues, such as insulin glargine 100 U/mL (Gla-100) have significantly contributed to diabetes management over the last decade. The new insulin glargine 300 U/mL (Gla-300) has a flatter and more prolonged profile than Gla-100 and may further improve safety and tolerability.

### **Aims**

The trial was conducted to compare the efficacy of the new insulin glargine Gla-300 with Gla-100 in people with type 2 diabetes receiving basal plus mealtime insulin in terms of change in HbA<sub>1c</sub> and occurrence of nocturnal hypoglycemia from baseline to month 6.

### **Design**

The study was a multicenter, randomized, open-label, parallel-group phase 3 study consisting of a  $\leq 2$  week screening period, a main 6-month treatment period, a 6-month on-treatment safety extension period, and a 4-week post-treatment follow-up period in a subset of participants. An additional 3-month substudy after the main 6-month study period was carried out in a subset of participants randomized and treated with Gla-300 to investigate the effect of adapting the interval between doses ( $24 \pm 3$  hour) vs a fixed 24 hour interval between doses. Adults ( $\geq 18$  years) with type 2 diabetes and a HbA<sub>1c</sub> level of 7–10 % using basal ( $\geq 42$  U/day) plus mealtime insulin and self-monitoring their blood glucose were eligible for inclusion in the study. The key exclusion criteria were:  $\leq 1$  year on combined basal and mealtime insulin; using regular human insulin as a mealtime insulin in the 3 months, initiation of a new glucose-lowering therapy in 3 months or using an insulin pump in the 6 months before the screening visit; history or presence of significant diabetic retinopathy or macular edema requiring treatment or surgery and current; planned pregnancy during the study period. Participants were randomized to once-daily Gla-300 or Gla-100 taken in the evening in addition to their regular mealtime insulin (and metformin if required).

### **Randomization**

Participants were randomized to Gla-300 or Gla-100 in a 1:1 ratio. Randomization was stratified by HbA<sub>1c</sub> value at the screening stage prior to study commencement to guarantee a minimum of 20% randomized participants in each group per HbA<sub>1c</sub> stratum.

## SUPPLEMENTARY DATA

### **Primary and secondary endpoints**

The primary endpoint was change in HbA<sub>1c</sub> from baseline to month 6. The key secondary endpoints were: the incidence of participants with at least one confirmed ( $\leq 3.9$  mmol/L [ $\leq 70$  mg/dL]) or severe nocturnal hypoglycemic event between the start of week 9 and month 6, change in pre-injection plasma glucose and change in variability of pre-injection plasma glucose from baseline to month 6. Additional secondary endpoints were: percentage of participants with HbA<sub>1c</sub>  $< 7\%$  at month 6; change in fasting plasma glucose (FPG) between baseline and month 6; percentage of participants with FPG  $< 100$  mg/dL at month 6; change in 8-point self-monitored plasma glucose (SMPG) profile per timepoint from baseline to month 6; change in daily basal insulin dose from baseline to month 6 and change in treatment satisfaction score using the Diabetes Treatment Satisfaction Questionnaire (DTSQs) from baseline to month 6.

Analysis of safety and tolerability was based on the number of hypoglycemic events observed, local tolerability at injection site, hypersensitivity reactions, observed AEs and SAEs and other information including clinical laboratory data and vital signs such as body weight, 12-lead ECG and AIA results.

### **Statistics**

A sample size of 800 evaluable participants was estimated to give 99% power for the upper confidence limit of the mean difference in change of HbA<sub>1c</sub> between insulin formulations not to exceed 4.4 mmol/mol (0.4%), assuming that the SD of change is 14.2 mmol/mol (1.3%), for a true difference of 0.0%.

Primary efficacy endpoints were analyzed using an analysis of covariance (ANCOVA) model with treatment, screening HbA<sub>1c</sub> stratification ( $< 8\%$  and  $\geq 8\%$ ) and country as fixed effects and baseline HbA<sub>1c</sub> level as a covariate. Subgroup analyses were performed to assess consistency of treatment effect across baseline and demographic factors. Secondary endpoints were analyzed using analysis of variance (ANOVA), ANCOVA or Cochran-Mantel-Haenszel models as appropriate. No interim analyses were planned.

### **Ethics and trial registration**

The study protocol and informed consent form were approved by local ethics committees and the trial was registered on the public registry website, [www.clinicaltrials.gov](http://www.clinicaltrials.gov) in compliance with Sanofi public disclosure commitments. Each patient provided informed consent at study enrolment.

**Study sponsor:** Sanofi

**Study start date:** December 2011

**Study end date:** September 2013
